# Supplementary material
Source: Elsevier journal article supplement (https://www.sciencedirect.com/science/article/pii/S0213911116300504)
Supplement: mmc1 [file S0213911116300504:mmc1.docx]

**Appendix. Supplementary data**

**Table I**

Characteristics and data extracted from the case-control and cohort studies included

| Author (year) | Country or region where it was developed | Number of never-smoking cases and study design | Females (%)  Nº of adjust. variables | Mean or median age  cases/controls | Relative risk for drinkers vs. Non drinkers  (95%CI)  among people who have never smoked | Lung cancer risk broken down by amount of alcohol intake  (95%CI)  among people who have never smoked | | | | | Quality score |
| --- | --- | --- | --- | --- | --- | --- | --- | --- | --- | --- | --- |
| Troche  (2015) | USA | 525  Cohort | Not specified  11 | Not specified | Not specified | HR  0.01-0.49drinks/d: 116 (0.95-1.43)  0.5-0.99drinks/d: 0.92 (0.64-1.32)  1.00-2.99drinks/d: 1.37 (1.02-1.84)  ≥3.00drinks/d: 0.81 (0.46-1.44) | | | | | 9 |
| Thun  (2009)18 | USA | 1,058  Cohort | 61.6%  3 | Median in cases:  Men: 55.4  Women: 55.5 | Men: 0.97  (0.76-1.22)  Women: 0.69 (0.41-1.16) | HR  <1drink/d:  1drink/d:  2-3 drinks/d:  +4drinks: | Men:  0.99 (0.78-1.26)  1.04 (0.71-1.53)  0.99 (0.75-1.31)  0.84 (0.55-1.27) | | | Women:  1.14 (0.95-1.35)  1.04 (0.76-1.43)  0.77 (0.77-1.30)  0.69 (0.41-1.16) | 8 |
| Shimazu  (2008)19 | Japan | 164  Cohort | 0%  2 | Not specified | Nondrinkers: 1.33 (0.76-2.35)  Occasional Drinkers: 1 | HR  1-149 g/week: 0.66 (0.35-1.26)  150-299 g/week: 0.78 (0.41-1.49)  300-449 g/week: 0.90 (0.44-1.83)  ≥450 g/week: 0.70 (0.31-1.57) | | | | | 6 |
| Rohrmann et al. (2006)20 | France, Italy, Spain, The Netherlands, United Kingdom, Greece, Germany, Sweden, Norway and Denmark | 97 for baseline intake  72 for mean lifelong intake  Cohort | Not specified  8 | Not specified | Not specified | HR  0g/day:  0.1-4.9 g/d:  5-14.9 g/d:  15-29.9 g/d:  30-59.9 g/d:  ≥60 | Baseline intake  0.64 (0.33-1.23)  1  0.93 (0.56-1.53)  0.67(0.32-1.41)  0.55 (0.17-1.83)  (0 cases) | | Mean lifelong intake  0.53 (0.22-1.23)  1  0.45 (0.25-0.84)  0.62(0.26-1.50)  0.37 (0.05-2.98)  1.23 (0.11-13.6) | | 7 |
| Yoshikazu Nishino et al.  (2006)21 | Japan | 31  Cohort | 0%  5 | All Cases+ controls  57.3 | Not specified | HR  Ever drinkers: 1.22 (0.43-3.45)  ≤24.9 g/day: 1.10 (0.35-3.51)  25-49.9 g/day: 0.37 (0.04-3.18)  ≥50 g/day: 1.15 (0.13-9.98)  Exdrinkers: 4.20 (1.12-15.72) | | | | | 6 |
| Freudenheim  (2005)22 | Canada, USA, and The Netherlands, | 247  Pooling Study of Cohort studies | 70%  3 | Not specified | Not specified | HR  0.1-4.9 g/day:  5-14.9 g/day:  ≥15 g/day: 6.38 | | Men:  1.49 (0.64-3.49)  2.53 (1.10-5.81)  (2.74-14.90) | | Women:  0.98 (0.69-1.37)  0.89 (0.52-1.54)  (0.64-2.87) | 9 |
| Tse et al.  (2012)23 | China | 131  Case-Control  Population based | 0%  8 | 65.8  66.2 | 1.26 (0.76-2.09) | OR  Never: 1.00  Occasional: 1.31 (0.80-2.14)  Frequent: 1.37 (0.80-2.32) | | | | | 7 |
| Bagnardi  (2010)24 | Italy (Lombardy region) | 125  Case-control  Population-based | Not specified  8 | Not specified | Not specified | **OR**  Nondrinker: 1.06 (0.54-2.07)  0.1-4.9 g/day 1.00  5-14.9 g/day 0.79 (0.41-1.52)  15-29.9 g/day 1.17 (0.65-2.13)  30-59.9 g/day 0.55 (0.25-1.21)  ≥60 g/day 1.41 (0.15-12.94) | | | | | 7 |
| Cui et al.  (2008)25 | USA (Los Angeles county) | 96  Case-Control  Population based | Not specified  5 | Not specified | Not specified | Not specified | | | | | 6 |
| Kubík et al.  (2008)16 | Czech Republic (Prague) | 158  Case-control  Hospital based | 88.6%  4 | Not specified | Not specified | Not specified | | | | | 5 |
| Hu et al.  (2002)15 | Canada | 161  Case-Control  Population based | 100%  4 | Not specified | Not specified | **OR**  0: 1.00  1 servings/week: 0.8 (0.5-1.4)  >1 servings/week: 0.8 (0.5-1.2) | | | | | 7 |
| Zang  (2001)26 | USA | 53  Case-control  Hospital based | 0%  2 | Not specified | Not specified | **OR**  <1whiskey-equivalent ounces per day: 1.00  1-5.9 : 1.2 (0.7-2.1)  ≥ 6: 0.7 (0.2-2.0) | | | | | 3 |
| Rachtan  (2002)27 | Poland | 54  Case-Control  Hospital based | 100%  22 | Cases+controls:  61.0 / 58.0 | 3.47 (1.88-6.39) | **RR**  <1g/week: 1.00  1-4g/week: 3.89 (1.82-8.32)  4-8 g/week: 8.76 (2.81-27.29)  ≥8 g/week: 12.06 (3.94-36.91) | | | | | 6 |
| Murata  (1996)28 | Japan | 31  Nested Case-control | 0%  0 | Not specified | Not specified | **OR**  0 cups of saque/day : 1.0  0.1-1.0 cups of saque/day: 1.3  1.1- +cups of saque/day: 2.2  A cup of 180 mL of sake contains 27 mL of ethanol | | | | | 1 |

95%CI: 95% confidence interval; HR: hazard ratio; OR: odds ratio; RR: relative risk.
